# Supplementary material
Source: Springer Nature journal article supplement (https://www.springermedizin.de/resource/supplementary/12889_2014_7360_MOESM3_ESM.pdf/9497000)

mean temperature

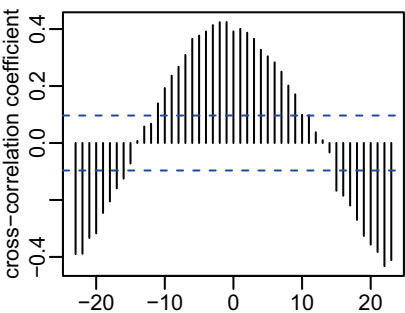

rainfall

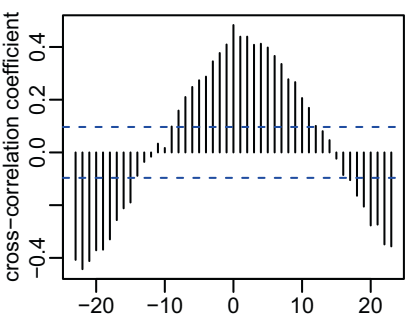

rainfall

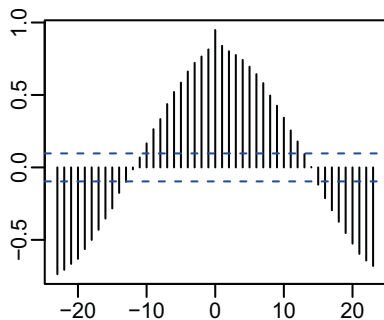

vapor pressure

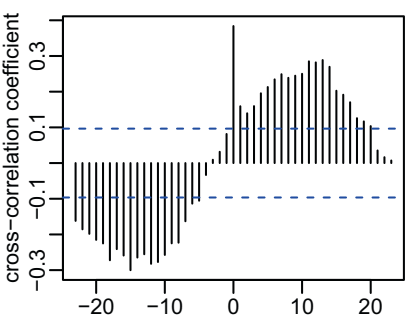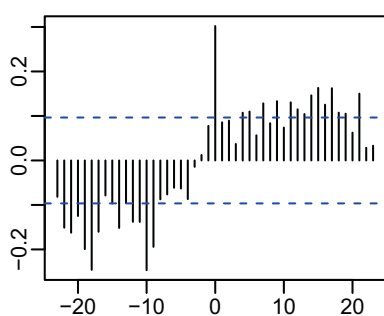

vapor pressure

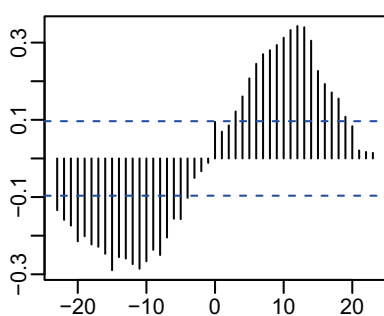

relative humidity

Supplement: MOESM3 [file 9497000]
